# Supplementary material
Source: PubMed Central journal article supplement (PMC6728084)
Supplement: NIHMS1040086-supplement-Supplement.pdf [file NIHMS1040086-supplement-Supplement.pdf]

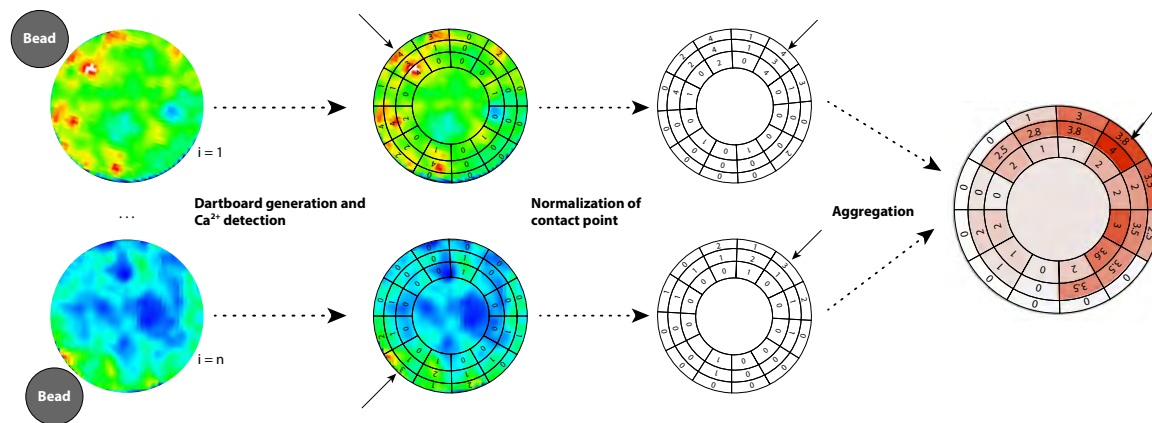

**Fig. S1 Generation of dartboard projection**

Dartboard workflow: First a dartboard is projected on every T cell ( $i=1$  to  $n$ ). Then, all T cells are spatio-temporally normalized for bead contact site and time. The mean number of  $\text{Ca}^{2+}$  microdomains is analyzed and depicted as dartboard; data are available for the whole cell, each dartboard sections, or combinations of such sections. Sections (or combinations) can be selected for further subcellular analysis.

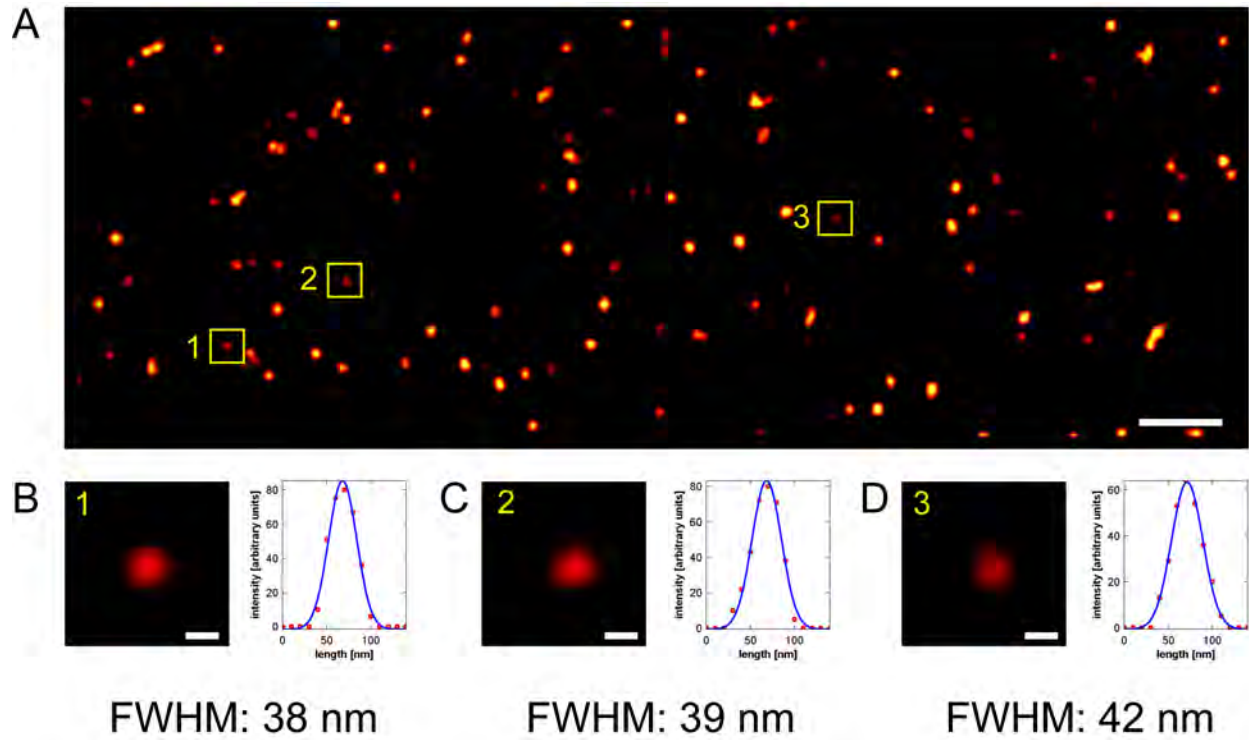

**Fig. S2 Resolution of the STED microscope**

40 nm Crimson beads were scanned in STED mode to estimate the system resolution. From a large field of view (A), 10 individual beads were selected to determine the FWHM, 3 of which are shown in (B-D) along with the Gaussian-fit function. Scale bars: (A) 500 nm, (B-D): 40 nm. In this way, a FWHM of  $41 \pm 3$  nm ( $n=10$ ) for the individual Crimson bead was measured. Thus the STED microscope, in the configuration it was used during the experiment described can resolve nano-objects up to 40 nm apart from each other.

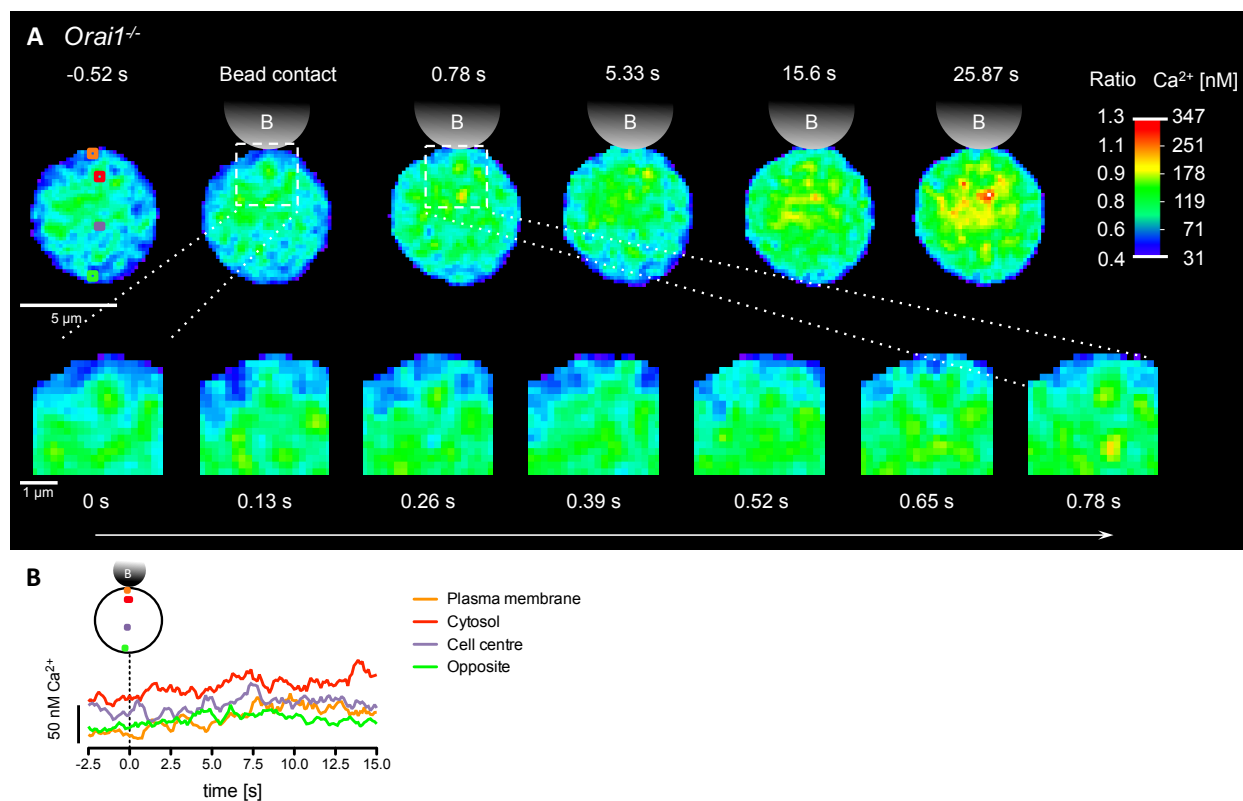

**Fig. S3 Example of an *Orail*<sup>-/-</sup> T cell with Ca<sup>2+</sup> microdomains occurring more deeply within the cytosol**

(A) Initial Ca<sup>2+</sup> microdomains in a representative *Orail*<sup>-/-</sup> T cell (total number of *Orail*<sup>-/-</sup> T cells analyzed = 28) with Ca<sup>2+</sup> microdomains occurring more deeply within the cytosol upon anti-CD3/anti-CD28 stimulation (bead contact; indicated schematically) and a magnified region near the bead contact. (B) Respective Ca<sup>2+</sup> tracings of four ROIs (3x3 pixel) shown in (A). Dashed line indicates time point of bead contact.

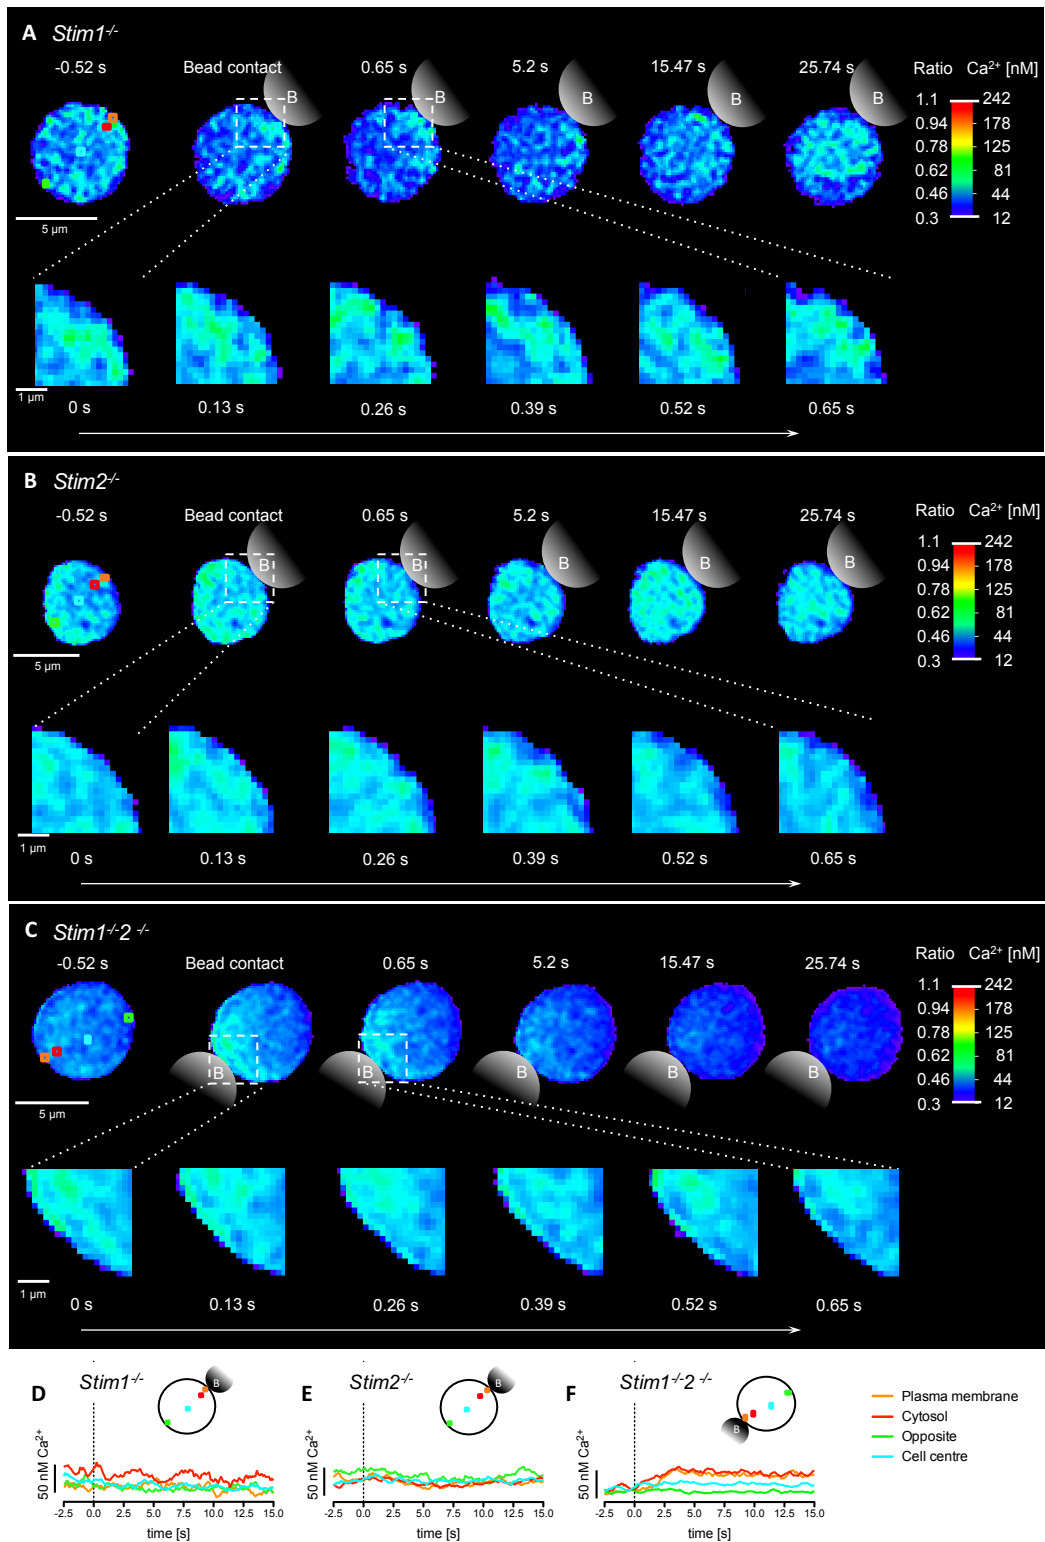

**Fig. S4** Markedly decreased initial Ca<sup>2+</sup> microdomains in *Stim1*<sup>-/-</sup>, *Stim2*<sup>-/-</sup> and *Stim1*<sup>-/-2</sup><sup>-/-</sup> T cells

Initial  $\text{Ca}^{2+}$  microdomains in representative cells, a *Stim1*<sup>-/-</sup> T cell (A; total number of *Stim1*<sup>-/-</sup> T cell analyzed =24 ), a CD4+ *Stim2*<sup>-/-</sup> T cell (B; total number of *Stim2*<sup>-/-</sup> T cells analyzed =39 ) and a *Stim1*<sup>-/-</sup>/*2*<sup>-/-</sup> (C; total number of *Stim1*<sup>-/-</sup>/*2*<sup>-/-</sup> T cells analyzed =46) upon bead contact (indicated schematically) and a magnified region near the bead contact. (D-F) Respective  $\text{Ca}^{2+}$  tracings of the four ROIs (3x3 pixel) shown in (A-C, as indicated). Dashed lines indicate the time point of bead contact.

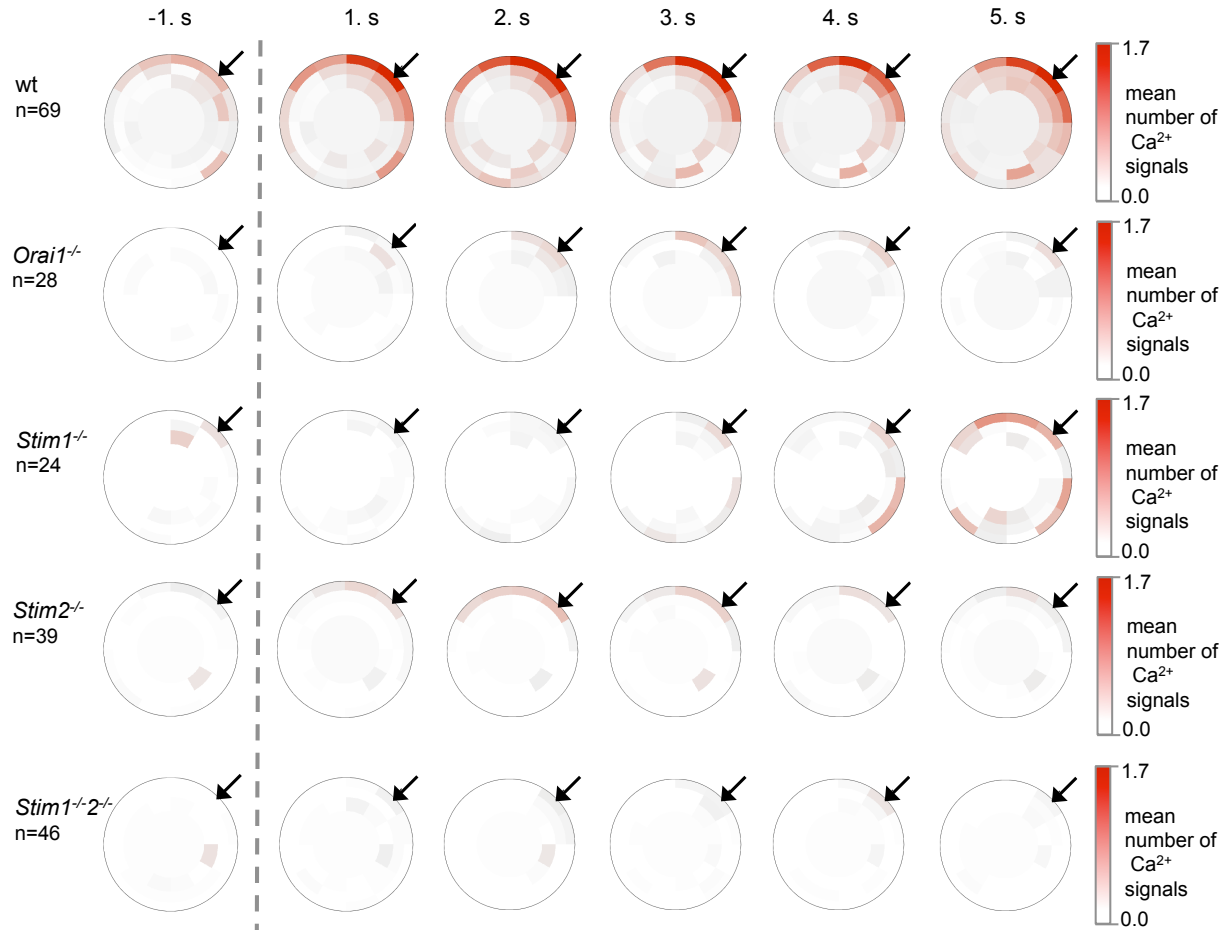

**Fig. S5 Comparison of initial  $\text{Ca}^{2+}$  microdomains in primary murine T cells in a dartboard projection**

Primary wt (n = 69 cells), *Orai1*<sup>-/-</sup> (n = 28 cells), *Stim1*<sup>-/-</sup> (n = 24 cells), *Stim2*<sup>-/-</sup> (n = 39 cells), *Stim1*<sup>-/-</sup>*2*<sup>-/-</sup> (n = 46 cells) were stimulated by anti-CD3/anti-CD28 coated beads; the bead contact site is indicated as black arrow. Initial  $\text{Ca}^{2+}$  signals as detected in the last second before stimulation (-1.sec), or in the 1<sup>st</sup> second (1. sec) until 5<sup>th</sup> second (5. sec).

T cells were normalized spatially regarding the bead contact site and the time of bead contact. The dartboard shows mean values of number of  $\text{Ca}^{2+}$  signals in all T cells (for each genotype as indicated). Max. relative value is 1.7 (dark red) as indicated.

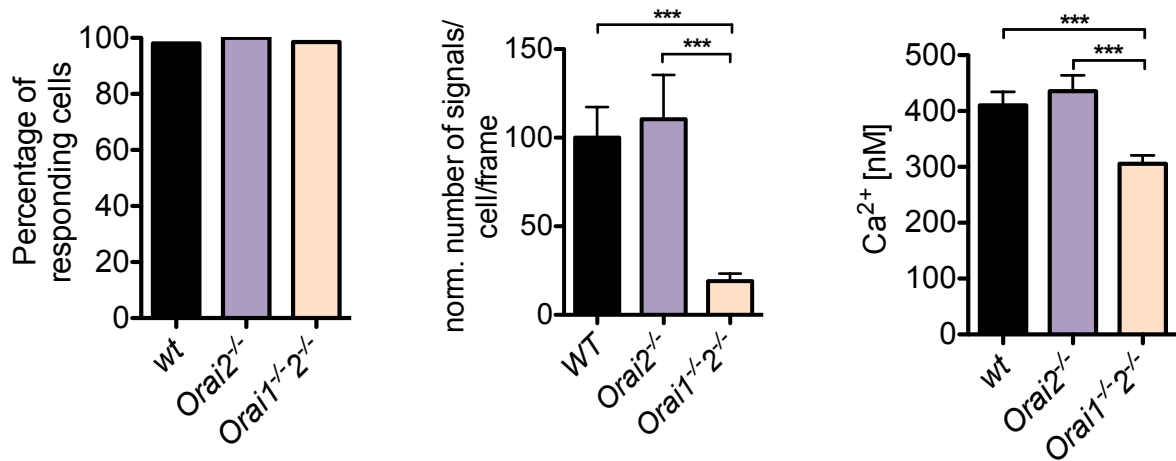

**Fig. S6 *Orai2*<sup>-/-</sup> is not involved in the formation of initial Ca<sup>2+</sup> microdomains**

Characteristics of initial Ca<sup>2+</sup> microdomains in primary murine CD4<sup>+</sup> wt (n=28), *Orai2*<sup>-/-</sup> (n=20) and *Orai1*<sup>-/-</sup>*2*<sup>-/-</sup> (n=35) in the first 15 sec following bead contact. Comparison of the percentage of responding cells, the number of signals per cell and frame and the Ca<sup>2+</sup> amplitude (data represent mean ± SEM). Statistically significant differences are marked by asterisks (\* p<0.05, \*\* p<0.01, \*\*\* p<0.001, Kruskal-Wallis Test).

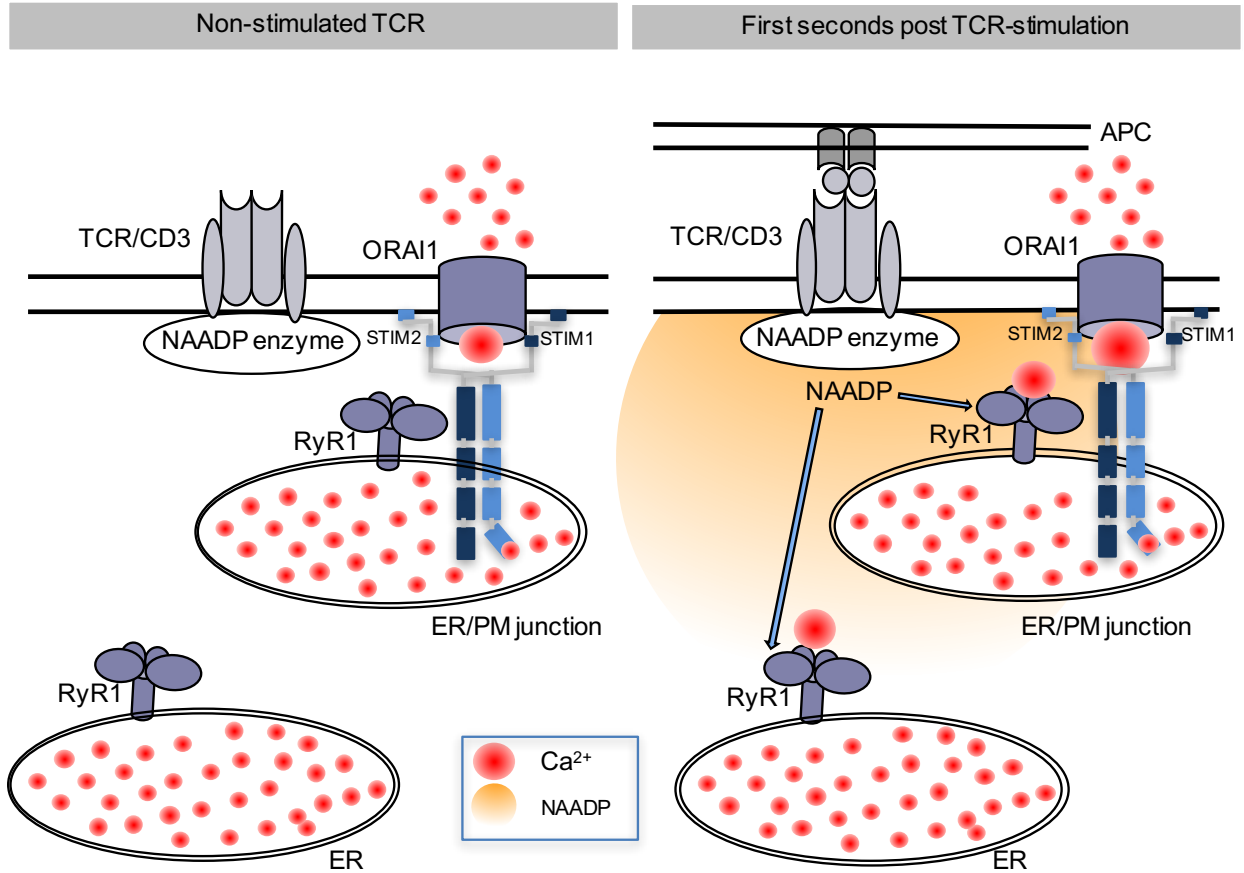

**Fig. S7 New model for the formation of initial Ca<sup>2+</sup> microdomains in T cells**

In non-stimulated T cells, ORAI1 and STIM1/STIM2 form protein complexes at defined plasma membrane sites resulting in spontaneous, discrete, local Ca<sup>2+</sup> entry signals. These constitutive Ca<sup>2+</sup> microdomains do not further propagate without cell activation. Upon TCR stimulation, RyR1 is activated, probably by NAADP formed within seconds of T cell stimulation, resulting in local and transient Ca<sup>2+</sup> release. NAADP is believed to act via a binding protein, shown here tentatively as 'BP'. NAADP evoked Ca<sup>2+</sup> release via RyR1 contributes directly to Ca<sup>2+</sup> microdomains and, in addition, promotes the activation of STIM1, STIM2 and thus SOCE through ORAI1 channels thereby amplifying initial Ca<sup>2+</sup> microdomains upon TCR stimulation. STIM1 and STIM2 are drawn here as heterodimers, as in (28); however, from our end there is no definitive experimental proof for such heterodimers.



**Movie S1 Initial Ca<sup>2+</sup> microdomains in a wt T cell after stimulation**

Initial Ca<sup>2+</sup> microdomains in a wt T cell upon bead contact (indicated schematically at timepoint = 0). Acquisition speed was 40 frames/s, movie playback at 20 frames/s. Length scale bar and ratio as indicated. Five subsequent images were merged to decrease noise.

**Movie S2 *Orai1*<sup>-/-</sup> T cell upon bead contact**

Decreased initial Ca<sup>2+</sup> microdomains in a representative *Orai1*<sup>-/-</sup> T cell upon bead contact (indicated schematically at timepoint = 0). Acquisition speed was 40 frames/s, movie playback at 20 frames/s. Length scale bar and ratio as indicated. Five subsequent images were merged to decrease noise.

**Movie S3 *Stim1*<sup>-/-</sup> *2*<sup>-/-</sup> T cell upon bead contact**

Decreased initial Ca<sup>2+</sup> microdomains in a representative *Stim1*<sup>-/-</sup> *2*<sup>-/-</sup> T cell upon bead contact (indicated schematically at timepoint = 0). Acquisition speed was 40 frames/s, movie playback at 20 frames/s. Length scale bar and ratio as indicated. Five subsequent images were merged to decrease noise.
